# Supplementary material for: Transcriptome profiling and RNA-Seq SNP analysis of reniform nematode (Rotylenchulus reniformis) resistant cotton (Gossypium hirsutum) identifies activated defense pathways and candidate resistance genes
Source: Front Plant Sci. 2025 Feb 19;16:1532943. doi: 10.3389/fpls.2025.1532943 (PMC11879972; doi:10.3389/fpls.2025.1532943)
Supplement: Supplementary file 4 [file Table4.xlsx]

## Sheet: Redox DEGs
			DeSeq2 results						Corresponding gene and/or coordinatesin the reference genome						G.hirsutum_Tx_JGI_v1.1_vs_SwissProt															G.hirsutum_Tx_JGI_v1.1_vs_TrEMBL															Ghirsutum_458_v1.1.annotation_info
sort_col	count_ID	StringTie_ID	Base_mean	log2(FC)	StdErr	Wald-Stats	P-value	P-adj	chr	alias	transcript_start	transcript_end	strand	gene_name	Q length	Match (M)	Description	%Identity	Align length	Mismatch	Gap	Q start	Q stop	Q frame	M start	M stop	M frame	E-value	Score	Q length	Match (M)	Description	%Identity	Align length	Mismatch	Gap	Q start	Q stop	Q frame	M start	M stop	M frame	E-value	Score	transcriptName	locusName		#pacId	peptideName
1116	htseq _R_5DAI	MSTRG.148795	318.712	1.27279	0.306667	4.15038	3.3192e-05	0.0025827	scaffold_379		69621	71693	-	Gohir.1Z057300	1349	Q9ZSA7	Protein DMR6-LIKE OXYGENASE 2 OS=Arabidopsis thaliana GN=DLO2 PE=2 SV=1	30.84	308	213	18	189	1079	3	40	340	0	6.91629e-37	356	1349	A0A1U8MU28	1-aminocyclopropane-1-carboxylate oxidase-like OS=Gossypium hirsutum GN=LOC107941276 PE=3 SV=1	100	345	0	0	72	1106	3	1	345	0	0	1844	Gohir.1Z057300.1	Gohir.1Z057300	506233	38088461	Gohir.1Z057300.1.p
1018	htseq _R_5DAI	MSTRG.4238	139.804	1.78092	0.236175	7.54067	4.67571e-14	4.25096e-11	A01	chr.01	97679867	97681867	+	Gohir.A01G189900	1530	P06525	Alcohol dehydrogenase class-P OS=Arabidopsis thaliana GN=ADH1 PE=1 SV=2	79.31	382	79	3	123	1268	3	1	379	0	0	1554	1530	A4L9G2	Alcohol dehydrogenase A OS=Gossypium raimondii GN=B456_002G222900 PE=3 SV=1	100	382	0	0	123	1268	3	1	382	0	0	1934	Gohir.A01G189900.1	Gohir.A01G189900	15731	38147813	Gohir.A01G189900.1.p
2104	htseq _R_13DAI	MSTRG.4383	228.734	-1.04707	0.297126	-3.52399	0.000425092	0.013174	A01	chr.01	98997206	98999533	-	Gohir.A01G195100	1808	Q42798	3,9-dihydroxypterocarpan 6A-monooxygenase OS=Glycine max GN=CYP93A1 PE=1 SV=1	44.19	482	269	11	124	1551	1	30	506	0	5.08449e-146	1118	1808	A0A1U8L063	3,9-dihydroxypterocarpan 6A-monooxygenase OS=Gossypium hirsutum GN=LOC107921086 PE=3 SV=1	99.61	515	2	0	7	1551	1	1	515	0	0	2713	Gohir.A01G195100.1	Gohir.A01G195100	16106	38147360	Gohir.A01G195100.1.p
1852	htseq _R_13DAI	MSTRG.5956	216.377	1.12827	0.249023	4.53081	5.87587e-06	0.000362955	A02	chr.02	4859811	4868791	-	Gohir.A02G037500	1580	Q84MB3	1-aminocyclopropane-1-carboxylate oxidase homolog 1 OS=Arabidopsis thaliana GN=At1g06620 PE=2 SV=1	58.75	354	146	0	390	1451	3	12	365	0	9.06435e-150	1121	1580	A0A1U8L5P3	1-aminocyclopropane-1-carboxylate oxidase homolog 1-like OS=Gossypium hirsutum GN=LOC107924139 PE=3 SV=1	100	371	0	0	339	1451	3	1	371	0	0	1910	Gohir.A02G037500.1	Gohir.A02G037500	21232	38090412	Gohir.A02G037500.1.p
1726	htseq _R_13DAI	MSTRG.8024	746.152	-1.31816	0.253874	-5.19219	2.07832e-07	1.90833e-05	A02	chr.02	72444246	72446108	-	Gohir.A02G124000	1215	Q945B6	Probable 2-oxoglutarate-dependent dioxygenase AOP1.2 OS=Arabidopsis thaliana GN=AOP1.2 PE=2 SV=1	41.41	297	174	12	59	925	2	13	305	0	1.3846e-69	573	1215	A0A1U8NX25	probable 2-oxoglutarate-dependent dioxygenase AOP1 OS=Gossypium hirsutum GN=LOC107951872 PE=3 SV=1	99.68	313	1	0	38	976	2	1	313	0	0	1701	Gohir.A02G124000.1	Gohir.A02G124000	28054	38090021	Gohir.A02G124000.1.p
1052	htseq _R_5DAI	MSTRG.8041	65.4973	1.66379	0.284947	5.83896	5.25282e-09	1.39596e-06	A02	chr.02	75153698	75160198	-	Gohir.A02G125500	1531	Q9ZSA7	Protein DMR6-LIKE OXYGENASE 2 OS=Arabidopsis thaliana GN=DLO2 PE=2 SV=1	30.27	294	205	18	34	882	1	40	326	0	1.19358e-33	335	1531	A0A1U8NWP2	protein DMR6-LIKE OXYGENASE 2-like OS=Gossypium hirsutum GN=LOC107951768 PE=3 SV=1	100	290	0	0	19	888	1	35	324	0	0	1561	Gohir.A02G125500.1	Gohir.A02G125500	28100	38089851	Gohir.A02G125500.1.p
1388	htseq _R_9DAI	MSTRG.10730	151.75	1.08837	0.267367	4.07071	4.68702e-05	0.0217651	A03	chr.03	14453976	14457144	+	Gohir.A03G061200	1693	Q38946	Glutamate dehydrogenase 2 OS=Arabidopsis thaliana GN=GDH2 PE=1 SV=1	88.32	411	48	0	182	1414	2	1	411	0	0	2005	1693	A0A1U8HQN4	Glutamate dehydrogenase OS=Gossypium hirsutum GN=LOC107886252 PE=3 SV=1	100	411	0	0	182	1414	2	1	411	0	0	2203	Gohir.A03G061200.1	Gohir.A03G061200	37201	38105836	Gohir.A03G061200.1.p
1936	htseq _R_13DAI	MSTRG.11623	97.3569	-1.37188	0.32777	-4.18548	2.84562e-05	0.0013968	A03	chr.03	52032699	52035380	+	Gohir.A03G098000	1341	Q8VYI1	Sphinganine C4-monooxygenase 1 OS=Arabidopsis thaliana GN=SBH1 PE=1 SV=1	79.45	258	53	0	297	1070	3	3	260	0	8.00871e-131	978	1341	A0A1U8NY99	sphinganine C4-monooxygenase 1-like OS=Gossypium hirsutum GN=LOC107952288 PE=3 SV=1	100	258	0	0	297	1070	3	1	258	0	2.83821e-164	1212	Gohir.A03G098000.1	Gohir.A03G098000	39949	38104388	Gohir.A03G098000.1.p
1652	htseq _R_13DAI	MSTRG.11901	1340.61	-1.0391	0.179114	-5.80132	6.57947e-09	8.27886e-07	A03	chr.03	67472667	67495662	-	Gohir.A03G110100	1298	O23044	Peroxidase 3 OS=Arabidopsis thaliana GN=PER3 PE=2 SV=1	66.04	321	109	1	79	1041	1	7	326	0	1.60837e-156	1152	1298	A0A1U8HTD6	Peroxidase OS=Gossypium hirsutum GN=LOC107887476 PE=3 SV=1	100	327	0	0	61	1041	1	1	327	0	0	1742	Gohir.A03G110100.1	Gohir.A03G110100	40760	38105432	Gohir.A03G110100.1.p
1021	htseq _R_5DAI	MSTRG.12619	626.066	1.14559	0.154835	7.3988	1.37424e-13	1.07903e-10	A03	chr.03	93772796	93775512	+	Gohir.A03G138800	2264	O80763	Probable nucleoredoxin 1 OS=Arabidopsis thaliana GN=At1g60420 PE=1 SV=1	66.54	571	191	13	251	1924	2	8	578	0	0	2055	2264	A0A1U8HJ28	probable nucleoredoxin 1 OS=Gossypium hirsutum GN=LOC107886589 PE=4 SV=1	99.82	570	1	0	218	1927	2	1	570	0	0	2955	Gohir.A03G138800.1	Gohir.A03G138800	42750	38104871	Gohir.A03G138800.1.p
2007	htseq _R_13DAI	MSTRG.12972	110.82	-1.15213	0.296337	-3.88791	0.000101111	0.00405921	A03	chr.03	99511306	99512615	-	Gohir.A03G153000	1232	Q9SAA9	Sterol 14-demethylase OS=Arabidopsis thaliana GN=CYP51G1 PE=1 SV=1	86.47	355	48	0	2	1066	2	134	488	0	0	1625	1232	A0A1U8II62	sterol 14-demethylase-like OS=Gossypium hirsutum GN=LOC107896963 PE=3 SV=1	99.71	357	1	0	2	1072	2	130	486	0	0	1842	Gohir.A03G153000.1	Gohir.A03G153000	43832	38104173	Gohir.A03G153000.1.p
1264	htseq _R_9DAI	MSTRG.16233	126.726	-1.51196	0.29622	-5.10418	3.32241e-07	0.000470024	A04	chr.04	69109006	69111267	-	Gohir.A04G086500	1958	Q9SR40	Laccase-7 OS=Arabidopsis thaliana GN=LAC7 PE=2 SV=1	59.49	553	224	16	59	1702	2	9	550	0	0	1741	1958	A0A1U8NIW6	Laccase OS=Gossypium hirsutum GN=LOC107948848 PE=3 SV=1	100	556	0	0	35	1702	2	1	556	0	0	2893	Gohir.A04G086500.1	Gohir.A04G086500	53501	38117166	Gohir.A04G086500.1.p
1785	htseq _R_13DAI	MSTRG.16368	290.006	1.24291	0.255303	4.86839	1.12509e-06	8.49411e-05	A04	chr.04	71489818	71492756	+	Gohir.A04G091900	2182	P48619	Omega-3 fatty acid desaturase, chloroplastic OS=Ricinus communis GN=FAD7A-1 PE=2 SV=1	73.78	454	119	19	308	1627	2	3	451	0	0	1690	2182	A0A0A7EQN9	Chloroplast omega-3 fatty acid desaturase OS=Gossypium hirsutum GN=FAD78-1A PE=2 SV=1	100	446	0	0	305	1642	2	1	446	0	0	2268	Gohir.A04G091900.1	Gohir.A04G091900	53896	38115706	Gohir.A04G091900.1.p
2233	htseq _R_13DAI	MSTRG.20315	53.4571	-1.11505	0.361158	-3.08745	0.00201885	0.0439666	A05	chr.05	12458137	12459988	+	Gohir.A05G129700	1180	Q945B6	Probable 2-oxoglutarate-dependent dioxygenase AOP1.2 OS=Arabidopsis thaliana GN=AOP1.2 PE=2 SV=1	38.8	250	153	8	106	840	1	9	255	0	2.36709e-56	483	1178	A0A1U8MYN8	2-oxoglutarate-dependent dioxygenase AOP2-like isoform X1 OS=Gossypium hirsutum GN=LOC107942753 PE=3 SV=1	100	338	0	0	20	1033	2	1	338	0	0	1839	Gohir.A05G129700.1	Gohir.A05G129700	69515	38119871	Gohir.A05G129700.1.p
2116	htseq _R_13DAI	MSTRG.20361	66.5758	-1.30212	0.373931	-3.48225	0.000497226	0.0148181	A05	chr.05	12643684	12644453	-	Gohir.A05G132000	764	Q9XEX2	Peroxiredoxin-2B OS=Arabidopsis thaliana GN=PRXIIB PE=1 SV=1	72.78	158	43	0	58	531	1	1	158	0	5.60309e-82	626	764	A0A1U8KIM6	peroxiredoxin-2B-like OS=Gossypium hirsutum GN=LOC107917583 PE=4 SV=1	100	158	0	0	58	531	1	1	158	0	4.34622e-111	832	Gohir.A05G132000.1	Gohir.A05G132000	69636	38119064	Gohir.A05G132000.1.p
2047	htseq _R_13DAI	MSTRG.21406	63.7145	-1.31215	0.350782	-3.74064	0.000183553	0.00659021	A05	chr.05	18041249	18041853	+	Gohir.A05G184400	1536	Q7XWU3	Probable cinnamyl alcohol dehydrogenase 6 OS=Oryza sativa subsp. japonica GN=CAD6 PE=2 SV=2	73.38	357	95	2	275	1339	2	4	360	0	0	1410	1536	A0A1U8PGH5	probable cinnamyl alcohol dehydrogenase 6 OS=Gossypium hirsutum GN=LOC107958204 PE=3 SV=1	100	359	0	0	263	1339	2	1	359	0	0	1849	Gohir.A05G184400.1	Gohir.A05G184400	73689	38117726	Gohir.A05G184400.1.p
1025	htseq _R_5DAI	MSTRG.22764	1133.33	1.01333	0.144253	7.02467	2.14574e-12	1.37279e-09	A05	chr.05	27140083	27149193	-	Gohir.A05G249500	2225	Q9FY79	Laccase-14 OS=Arabidopsis thaliana GN=LAC14 PE=2 SV=1	46.52	561	300	21	307	1956	1	19	569	0	3.80866e-178	1350	2225	A0A1U8PLN5	Laccase OS=Gossypium hirsutum GN=LOC107959545 PE=3 SV=1	100	566	0	0	268	1965	1	1	566	0	0	3037	Gohir.A05G249500.1	Gohir.A05G249500	78892	38119135	Gohir.A05G249500.1.p
2040	htseq _R_13DAI	MSTRG.22892	128.175	1.054	0.280317	3.76003	0.000169894	0.00618974	A05	chr.05	27971087	27973980	-	Gohir.A05G255000	2094	Q00624	L-ascorbate oxidase homolog OS=Brassica napus GN=Bp10 PE=2 SV=1	55.59	518	230	10	210	1736	3	24	540	0	0	1452	2094	A0A0B0P2S9	L-ascorbate oxidase OS=Gossypium arboreum GN=F383_04352 PE=4 SV=1	99.81	541	1	0	144	1766	3	1	541	0	0	2779	Gohir.A05G255000.1	Gohir.A05G255000	79309	38120752	Gohir.A05G255000.1.p
1798	htseq _R_13DAI	MSTRG.23063	514.21	1.05666	0.21957	4.81238	1.4914e-06	0.00010768	A05	chr.05	29312737	29330706	+	Gohir.A05G262800	1455	Q6WNQ8	Cytochrome P450 81E8 OS=Medicago truncatula GN=CYP81E8 PE=2 SV=1	48.46	489	252	19	7	1431	1	10	493	0	1.26416e-152	1149	1455	A0A0B0MXL1	Isoflavone 2&apos;-hydroxylase OS=Gossypium arboreum GN=F383_30791 PE=3 SV=1	92.18	499	39	15	1	1452	1	3	501	0	0	2450	Gohir.A05G262800.1	Gohir.A05G262800	79753	38121818	Gohir.A05G262800.1.p
1722	htseq _R_13DAI	MSTRG.23247	241.121	-1.41123	0.269964	-5.22748	1.71834e-07	1.61044e-05	A05	chr.05	30718613	30720648	+	Gohir.A05G269600	1290	Q84VY3	Stearoyl-[acyl-carrier-protein] 9-desaturase 6, chloroplastic OS=Arabidopsis thaliana GN=S-ACP-DES6 PE=2 SV=2	73.42	365	97	1	94	1185	1	27	391	0	0	1458	1290	A0A0B0PKV0	Acyl-[acyl-carrier-protein] desaturase 6, chloroplastic-like protein OS=Gossypium arboreum GN=F383_30742 PE=4 SV=1	99.48	387	2	0	25	1185	1	1	387	0	0	2085	Gohir.A05G269600.1	Gohir.A05G269600	80263	38118759	Gohir.A05G269600.1.p
1057	htseq _R_5DAI	MSTRG.23295	89.6323	1.53325	0.272863	5.6191	1.91953e-08	4.67014e-06	A05	chr.05	31024039	31024613	-	Gohir.A05G271700	1270	Q9FY79	Laccase-14 OS=Arabidopsis thaliana GN=LAC14 PE=2 SV=1	39.78	284	171	21	244	1032	1	34	317	0	3.1717e-63	550	1270	A0A0D2S9W9	Uncharacterized protein OS=Gossypium raimondii GN=B456_009G287100 PE=4 SV=1	96.27	295	11	0	166	1050	1	1	295	0	0	1414	Gohir.A05G271700.1	Gohir.A05G271700	80372	38122769	Gohir.A05G271700.1.p
1090	htseq _R_5DAI	MSTRG.23474	130.694	1.47668	0.311901	4.73445	2.19651e-06	0.000272967	A05	chr.05	32904656	32906238	+	Gohir.A05G280000	1204	A7NY33	Peroxidase 4 OS=Vitis vinifera GN=GSVIVT00023967001 PE=1 SV=1	73.68	247	65	3	20	760	2	3	246	0	7.06015e-126	919	1204	A0A0B0PLH9	Peroxidase OS=Gossypium arboreum GN=F383_06592 PE=3 SV=1	99.2	250	2	0	17	766	2	1	250	0	9.56596e-172	1231	Gohir.A05G280000.1	Gohir.A05G280000	80880	38121324	Gohir.A05G280000.1.p
1012	htseq _R_5DAI	MSTRG.26473	105.125	2.21354	0.268353	8.24863	1.60221e-16	2.30638e-13	A05	chr.05	98771609	98772651	-	Gohir.A05G401800	1294	Q9FLC0	Peroxidase 52 OS=Arabidopsis thaliana GN=PER52 PE=2 SV=1	79.79	297	60	0	126	1016	3	28	324	0	8.75104e-168	1226	1294	A0A0D2VUC0	Peroxidase OS=Gossypium raimondii GN=B456_012G016200 PE=3 SV=1	97.27	330	9	0	27	1016	3	1	330	0	0	1565	Gohir.A05G401800.1	Gohir.A05G401800	89951	38117590	Gohir.A05G401800.1.p
1516	htseq _R_13DAI	MSTRG.31956	2690.05	-1.71998	0.218333	-7.87775	3.33324e-15	1.13242e-12	A07	chr.07	1255581	1257742	-	Gohir.A07G010400	1244	Q9ZUN4	1-aminocyclopropane-1-carboxylate oxidase 1 OS=Arabidopsis thaliana GN=ACO1 PE=2 SV=1	70.94	296	86	1	172	1059	1	8	302	0	3.82794e-159	1166	1244	A0A0D2LRU6	Uncharacterized protein OS=Gossypium raimondii GN=B456_001G011100 PE=3 SV=1	97.36	304	8	0	175	1086	1	1	304	0	0	1595	Gohir.A07G010400.1	Gohir.A07G010400	108966	38133852	Gohir.A07G010400.1.p
1367	htseq _R_9DAI	MSTRG.33645	214.695	1.14207	0.273451	4.1765	2.96033e-05	0.0157279	A07	chr.07	13278186	13304069	-	Gohir.A07G084000	1298	Q08506	1-aminocyclopropane-1-carboxylate oxidase 1 OS=Petunia hybrida GN=ACO1 PE=1 SV=1	82.62	305	53	1	101	1012	2	1	305	0	4.33254e-174	1267	1298	A0A1U8PCY5	1-aminocyclopropane-1-carboxylate oxidase 3-like OS=Gossypium hirsutum GN=LOC107957214 PE=3 SV=1	98.02	304	6	0	101	1012	2	1	304	0	0	1455	Gohir.A07G084000.1	Gohir.A07G084000	.	38133727	Gohir.A07G084000.1.p
1996	htseq _R_13DAI	MSTRG.39041	129.043	-1.14995	0.293286	-3.92091	8.82148e-05	0.00361627	A08	LGA02/Chr.8	26666831	26667970	-	Gohir.A08G083500	1155	Q96518	Peroxidase 16 OS=Arabidopsis thaliana GN=PER16 PE=1 SV=2	75.68	329	80	6	24	1010	3	1	323	0	8.67891e-168	1221	1155	A0A1U8K2V8	Peroxidase OS=Gossypium hirsutum GN=LOC107912929 PE=3 SV=1	98.48	329	5	0	24	1010	3	1	329	0	0	1566	Gohir.A08G083500.1	Gohir.A08G083500	131515	38158040	Gohir.A08G083500.1.p
1037	htseq _R_5DAI	MSTRG.39567	201.324	1.35946	0.214428	6.33994	2.29856e-10	9.23379e-08	A08	LGA02/Chr.8	75805914	75809833	-	Gohir.A08G105000	1604	Q9FLV0	Protein DOWNY MILDEW RESISTANCE 6 OS=Arabidopsis thaliana GN=DMR6 PE=1 SV=1	71.76	340	96	3	184	1194	1	1	340	0	0	1360	1604	A0A1U8NG50	protein DOWNY MILDEW RESISTANCE 6-like OS=Gossypium hirsutum GN=LOC107948034 PE=3 SV=1	100	337	0	0	184	1194	1	1	337	0	0	1817	Gohir.A08G105000.1	Gohir.A08G105000	133243	38155641	Gohir.A08G105000.1.p
1382	htseq _R_9DAI	MSTRG.41850	20.9333	1.63217	0.397572	4.10536	4.03689e-05	0.0196741	A08	LGA02/Chr.8	118522783	118524484	-	Gohir.A08G203900	1246	P22195	Cationic peroxidase 1 OS=Arachis hypogaea GN=PNC1 PE=1 SV=2	69.9	309	93	2	83	1009	2	10	316	0	1.46206e-153	1130	1246	A0A1U8I7N2	Peroxidase OS=Gossypium hirsutum GN=LOC107893698 PE=3 SV=1	100	321	0	0	47	1009	2	1	321	0	0	1704	Gohir.A08G203900.1	Gohir.A08G203900	140592	38158168	Gohir.A08G203900.1.p
1011	htseq _R_5DAI	MSTRG.41995	267.024	1.65242	0.197366	8.37235	5.64811e-17	8.86959e-14	A08	LGA02/Chr.8	119262046	119264071	+	Gohir.A08G210400	2978	Q43191	Probable linoleate 9S-lipoxygenase 5 OS=Solanum tuberosum GN=LOX1.5 PE=2 SV=1	60.67	862	339	8	101	2677	2	6	862	0	0	2736	2978	A0A1U8IA59	Lipoxygenase OS=Gossypium hirsutum GN=LOC107894336 PE=3 SV=1	100	871	0	0	65	2677	2	1	871	0	0	4558	Gohir.A08G210400.1	Gohir.A08G210400	.	38157879	Gohir.A08G210400.1.p
1608	htseq _R_13DAI	MSTRG.42390	287.822	1.57016	0.246167	6.3784	1.78943e-10	2.82762e-08	A08	LGA02/Chr.8	121518953	121520525	+	Gohir.A08G229000	1210	Q42578	Peroxidase 53 OS=Arabidopsis thaliana GN=PER53 PE=1 SV=1	59.87	309	124	6	71	982	2	26	333	0	1.42026e-118	900	1210	A0A1U8LKA0	Peroxidase OS=Gossypium hirsutum GN=LOC107928271 PE=3 SV=1	100	322	0	0	17	982	2	1	322	0	0	1566	Gohir.A08G229000.1	Gohir.A08G229000	142919	38155741	Gohir.A08G229000.1.p
1036	htseq _R_5DAI	MSTRG.44069	247.863	1.26524	0.198526	6.37315	1.85182e-10	7.61628e-08	A09	chr.09	39299129	39300899	-	Gohir.A09G047200	1619	H2DH18	Cytochrome P450 CYP736A12 OS=Panax ginseng PE=2 SV=1	54.81	467	211	10	111	1484	3	35	500	0	5.10048e-177	1316	1619	A0A1U8PSI8	cytochrome P450 CYP736A12-like OS=Gossypium hirsutum GN=LOC107962293 PE=3 SV=1	100	493	0	0	6	1484	3	1	493	0	0	2456	Gohir.A09G047200.1	Gohir.A09G047200	148397	38148968	Gohir.A09G047200.1.p
2088	htseq _R_13DAI	MSTRG.45941	96.3248	-1.12503	0.315792	-3.56257	0.00036724	0.0117703	A09	chr.09	68203667	68207739	-	Gohir.A09G125800	1723	Q42798	3,9-dihydroxypterocarpan 6A-monooxygenase OS=Glycine max GN=CYP93A1 PE=1 SV=1	39.13	488	297	18	121	1545	1	24	506	0	1.91e-116	918	1723	A0A1U8HTV3	3,9-dihydroxypterocarpan 6A-monooxygenase-like OS=Gossypium hirsutum GN=LOC107889525 PE=3 SV=1	99.6	507	2	0	31	1551	1	1	507	0	0	2515	Gohir.A09G125800.1	Gohir.A09G125800	154547	38150071	Gohir.A09G125800.1.p
1676	htseq _R_13DAI	MSTRG.45946	182.964	-1.64813	0.292537	-5.63394	1.76141e-08	1.99472e-06	A09	chr.09	68234194	68236077	-	Gohir.A09G125900	1699	Q42798	3,9-dihydroxypterocarpan 6A-monooxygenase OS=Glycine max GN=CYP93A1 PE=1 SV=1	40.65	487	289	17	130	1551	1	24	506	0	2.98185e-121	949	1699	A0A1U8HTZ7	3,9-dihydroxypterocarpan 6A-monooxygenase-like OS=Gossypium hirsutum GN=LOC107889524 PE=3 SV=1	99.8	512	1	0	22	1557	1	1	512	0	0	2497	Gohir.A09G125900.1	Gohir.A09G125900	154549	38152110	Gohir.A09G125900.1.p
1352	htseq _R_9DAI	MSTRG.47074	154.115	-1.093	0.255988	-4.26974	1.957e-05	0.0115582	A09	chr.09	75469967	75471807	-	Gohir.A09G180300	1800	Q9SVG5	Berberine bridge enzyme-like 18 OS=Arabidopsis thaliana GN=At4g20820 PE=3 SV=1	51.11	540	264	23	27	1619	3	1	526	0	9.83754e-178	1330	1800	A0A1U8LRS4	cannabidiolic acid synthase-like OS=Gossypium hirsutum GN=LOC107930198 PE=3 SV=1	99.63	541	2	0	24	1646	3	1	541	0	0	2746	Gohir.A09G180300.1	Gohir.A09G180300	158786	38149244	Gohir.A09G180300.1.p
1218	htseq _R_9DAI	MSTRG.48675	83.7929	1.9226	0.305315	6.2971	3.03271e-10	1.08522e-06	A10	chr.10	574972	576707	-	Gohir.A10G006400	1807	Q9FZC8	Berberine bridge enzyme-like 7 OS=Arabidopsis thaliana GN=FOX5 PE=3 SV=1	56.34	504	220	8	94	1596	1	27	525	0	0	1353	1807	A0A1U8LCG4	flavin-dependent oxidoreductase FOX5-like OS=Gossypium hirsutum GN=LOC107925005 PE=3 SV=1	100	505	0	0	88	1602	1	26	530	0	0	2549	Gohir.A10G006400.1	Gohir.A10G006400	164813	38095969	Gohir.A10G006400.1.p
1638	htseq _R_13DAI	MSTRG.50999	85.5406	-2.17562	0.36634	-5.93879	2.87127e-09	3.86329e-07	A10	chr.10	37892586	37955160	-	Gohir.A10G114200	1599	H2DH22	Cytochrome P450 CYP73A100 OS=Panax ginseng PE=2 SV=1	77.47	506	114	16	112	1590	1	29	531	0	0	1870	1599	A0A1U8K5B1	LOW QUALITY PROTEIN: cytochrome P450 CYP73A100-like OS=Gossypium hirsutum GN=LOC107913579 PE=3 SV=1	91.96	535	43	3	1	1596	1	1	535	0	0	2328	Gohir.A10G114200.1	Gohir.A10G114200	173071	38096885	Gohir.A10G114200.1.p
1275	htseq _R_9DAI	MSTRG.52053	118.804	1.34568	0.270224	4.97985	6.36328e-07	0.000789988	A10	chr.10	83118846	83120728	+	Gohir.A10G155400	1873	Q9SVG5	Berberine bridge enzyme-like 18 OS=Arabidopsis thaliana GN=At4g20820 PE=3 SV=1	49.11	511	260	12	76	1608	1	29	527	0	8.00649e-162	1227	1873	A0A1U8IHJ0	cannabidiolic acid synthase-like OS=Gossypium hirsutum GN=LOC107896867 PE=3 SV=1	100	538	0	0	1	1614	1	6	543	0	0	2592	Gohir.A10G155400.1	Gohir.A10G155400	176565	38096186	Gohir.A10G155400.1.p
1363	htseq _R_9DAI	MSTRG.52588	46.5505	1.51424	0.359819	4.20834	2.57251e-05	0.0140984	A10	chr.10	95984904	95986274	-	Gohir.A10G176000	815	Q6E2Z6	1-Cys peroxiredoxin OS=Medicago truncatula PE=2 SV=1	73.97	219	57	1	40	696	1	1	218	0	6.82787e-123	903	815	A0A1U8ILL6	1-Cys peroxiredoxin-like OS=Gossypium hirsutum GN=LOC107896588 PE=4 SV=1	100	219	0	0	40	696	1	1	219	0	4.4587e-163	1181	Gohir.A10G176000.1	Gohir.A10G176000	178635	38094345	Gohir.A10G176000.1.p
1038	htseq _R_5DAI	MSTRG.53947	167.098	1.49416	0.236315	6.32273	2.5698e-10	9.86462e-08	A10	chr.10	111251442	111254170	-	Gohir.A10G237900	2076	Q9SIY8	Laccase-5 OS=Arabidopsis thaliana GN=LAC5 PE=2 SV=1	77.2	579	132	11	80	1792	2	5	580	0	0	2411	2076	A0A1U8MRN9	Laccase OS=Gossypium hirsutum GN=LOC107939389 PE=3 SV=1	100	569	0	0	86	1792	2	1	569	0	0	3065	Gohir.A10G237900.1	Gohir.A10G237900	182652	38096539	Gohir.A10G237900.1.p
1717	htseq _R_13DAI	MSTRG.59358	294.486	-1.42715	0.269937	-5.28698	1.24356e-07	1.18592e-05	A11	LGA03/Chr.11	82415012	82489729	+	Gohir.A11G231100	1253	Q8LGJ5	Plant cysteine oxidase 2 OS=Arabidopsis thaliana GN=PCO2 PE=1 SV=1	47.9	263	137	14	287	1057	2	22	276	0	3.81187e-70	574	1253	A0A0B0N1U2	Putative 2-aminoethanethiol dioxygenase OS=Gossypium arboreum GN=F383_31660 PE=4 SV=1	99.65	288	1	0	200	1063	2	1	288	0	0	1454	Gohir.A11G231100.1	Gohir.A11G231100	201589	38087790	Gohir.A11G231100.1.p
2168	htseq _R_13DAI	MSTRG.61861	282.645	-1.39387	0.418765	-3.32852	0.000873082	0.0228388	A12	chr.12	910443	911961	+	Gohir.A12G008200	1299	Q9SUT2	Peroxidase 39 OS=Arabidopsis thaliana GN=PER39 PE=1 SV=1	52.9	327	154	5	37	1005	1	1	326	0	1.99908e-109	841	1299	A0A1U8ME82	Peroxidase OS=Gossypium hirsutum GN=LOC107936832 PE=3 SV=1	96.71	335	11	0	1	1005	1	13	347	0	0	1667	Gohir.A12G008200.1	Gohir.A12G008200	.	38161847	Gohir.A12G008200.1.p
1953	htseq _R_13DAI	MSTRG.65252	98.4975	-1.42427	0.345391	-4.12364	3.7293e-05	0.00174609	A12	chr.12	86970862	86972079	+	Gohir.A12G156000	1243	Q43735	Peroxidase 27 OS=Arabidopsis thaliana GN=PER27 PE=1 SV=1	61.19	317	123	3	34	981	1	7	321	0	9.44519e-134	1000	1243	A0A1U8MVG3	Peroxidase OS=Gossypium hirsutum GN=LOC107940635 PE=3 SV=1	100	327	0	0	1	981	1	14	340	0	0	1678	Gohir.A12G156000.1	Gohir.A12G156000	220258	38162063	Gohir.A12G156000.1.p
1894	htseq _R_13DAI	MSTRG.71583	315.158	1.10442	0.254425	4.34086	1.41927e-05	0.000771488	A13	LGA01/Chr.13	92691492	92703761	-	Gohir.A13G155600	1506	Q9LHN8	Feruloyl CoA ortho-hydroxylase 1 OS=Arabidopsis thaliana GN=F6&apos;H1 PE=1 SV=1	63.98	361	130	2	75	1151	3	1	361	0	7.61351e-174	1277	1506	A0A1U8K7A8	feruloyl CoA ortho-hydroxylase 1-like OS=Gossypium hirsutum GN=LOC107912965 PE=3 SV=1	100	359	0	0	75	1151	3	1	359	0	0	1913	Gohir.A13G155600.1	Gohir.A13G155600	.	38154220	Gohir.A13G155600.1.p
1282	htseq _R_9DAI	MSTRG.72704	202.093	-1.28692	0.262992	-4.89338	9.91165e-07	0.00111657	A13	LGA01/Chr.13	101151905	101155007	+	Gohir.A13G204500	990	Q945B6	Probable 2-oxoglutarate-dependent dioxygenase AOP1.2 OS=Arabidopsis thaliana GN=AOP1.2 PE=2 SV=1	40.14	284	170	12	19	852	1	12	289	0	1.39553e-66	547	990	A0A1U8MI98	probable 2-oxoglutarate-dependent dioxygenase AOP1 OS=Gossypium hirsutum GN=LOC107938040 PE=3 SV=1	100	329	0	0	1	987	1	1	329	0	0	1679	Gohir.A13G204500.1	Gohir.A13G204500	245446	38154848	Gohir.A13G204500.1.p
1710	htseq _R_13DAI	MSTRG.77582	224.353	-1.59221	0.297685	-5.34865	8.86117e-08	8.72601e-06	D01	chr.15	60051032	60052969	+	Gohir.D01G185200	1710	Q42798	3,9-dihydroxypterocarpan 6A-monooxygenase OS=Glycine max GN=CYP93A1 PE=1 SV=1	51.85	511	246	11	68	1585	2	5	509	0	0	1427	1710	A0A0D2RB12	Uncharacterized protein OS=Gossypium raimondii GN=B456_002G228700 PE=3 SV=1	99.61	515	2	0	41	1585	2	1	515	0	0	2650	Gohir.D01G185200.1	Gohir.D01G185200	262059	38145521	Gohir.D01G185200.1.p
2021	htseq _R_13DAI	MSTRG.78475	63.2699	1.31776	0.342922	3.84275	0.000121661	0.00469692	D02	chr.14	383793	385863	-	Gohir.D02G005200	1763	O48923	Cytochrome P450 71D10 OS=Glycine max GN=CYP71D10 PE=2 SV=1	52.82	460	217	8	91	1455	1	54	510	0	3.97883e-178	1329	1763	A0A0D2N686	Uncharacterized protein OS=Gossypium raimondii GN=B456_005G005900 PE=3 SV=1	98.68	458	6	0	91	1464	1	41	498	0	0	2318	Gohir.D02G005200.1	Gohir.D02G005200	265407	38091234	Gohir.D02G005200.1.p
1886	htseq _R_13DAI	MSTRG.78789	101.058	1.32431	0.303454	4.36411	1.2764e-05	0.000710887	D02	chr.14	2524677	2548589	+	Gohir.D02G019300	1602	A6P6W0	Cannabidiolic acid synthase-like 1 OS=Cannabis sativa GN=CBDAS2 PE=2 SV=1	47.58	517	271	16	73	1590	1	28	539	0	1.98658e-156	1184	1602	A0A1U8MB41	cannabidiolic acid synthase-like 2 OS=Gossypium hirsutum GN=LOC107934808 PE=3 SV=1	97.94	535	11	2	1	1599	1	1	535	0	0	2616	Gohir.D02G019300.1	Gohir.D02G019300	266294	38093765	Gohir.D02G019300.1.p
1289	htseq _R_9DAI	MSTRG.78794	393.371	1.00534	0.206812	4.86114	1.16713e-06	0.00121975	D02	chr.14	2588976	2617992	+	Gohir.D02G019600	1817	A6P6W0	Cannabidiolic acid synthase-like 1 OS=Cannabis sativa GN=CBDAS2 PE=2 SV=1	49.9	519	260	16	93	1622	3	28	539	0	5.30433e-172	1294	1817	A0A1U8M9X8	cannabidiolic acid synthase-like 2 OS=Gossypium hirsutum GN=LOC107934434 PE=3 SV=1	100	540	0	0	21	1640	3	1	540	0	0	2774	Gohir.D02G019600.1	Gohir.D02G019600	266299	38093226	Gohir.D02G019600.1.p
1567	htseq _R_13DAI	MSTRG.79889	1913.11	-1.49792	0.216523	-6.91809	4.57774e-12	9.49759e-10	D02	chr.14	11078674	11080089	+	Gohir.D02G072500	1501	P06525	Alcohol dehydrogenase class-P OS=Arabidopsis thaliana GN=ADH1 PE=1 SV=2	85.6	375	54	0	65	1189	2	1	375	0	0	1689	1501	A0A0D2RB75	Uncharacterized protein OS=Gossypium raimondii GN=B456_005G081700 PE=3 SV=1	100	376	0	0	65	1192	2	1	376	0	0	1927	Gohir.D02G072500.1	Gohir.D02G072500	.	38091164	Gohir.D02G072500.1.p
1080	htseq _R_5DAI	MSTRG.80000	150.669	-1.09521	0.221763	-4.93864	7.86691e-07	0.000122426	D02	chr.14	13076036	13077540	+	Gohir.D02G078600	1249	Q0WPW4	1-aminocyclopropane-1-carboxylate oxidase 5 OS=Arabidopsis thaliana GN=At1g77330 PE=2 SV=1	69	313	97	12	274	1194	1	1	307	0	6.4641e-144	1066	1249	A0A1U8JY55	1-aminocyclopropane-1-carboxylate oxidase 5-like OS=Gossypium hirsutum GN=LOC107910369 PE=3 SV=1	100	307	0	0	274	1194	1	1	307	0	0	1543	Gohir.D02G078600.1	Gohir.D02G078600	270312	38090997	Gohir.D02G078600.1.p
2172	htseq _R_13DAI	MSTRG.81250	44.1782	-1.24824	0.377721	-3.30467	0.000950888	0.0244969	D02	chr.14	42881434	42884228	-	Gohir.D02G125300	1441	Q8VYI1	Sphinganine C4-monooxygenase 1 OS=Arabidopsis thaliana GN=SBH1 PE=1 SV=1	75.15	165	41	0	396	890	3	3	167	0	3.94821e-104	575	1441	A0A1U8JLG3	sphinganine C4-monooxygenase 1-like OS=Gossypium hirsutum GN=LOC107908451 PE=3 SV=1	99.39	165	1	0	396	890	3	1	165	0	7.49786e-131	771	Gohir.D02G125300.1	Gohir.D02G125300	274346	38092700	Gohir.D02G125300.1.p
1538	htseq _R_13DAI	MSTRG.81465	552.118	-1.69622	0.228986	-7.40752	1.28681e-13	3.42883e-11	D02	chr.14	47308941	47310676	-	Gohir.D02G134600	1232	Q43735	Peroxidase 27 OS=Arabidopsis thaliana GN=PER27 PE=1 SV=1	62.69	319	119	4	28	984	1	7	321	0	4.14941e-143	1061	1232	A0A1U8JL40	Peroxidase OS=Gossypium hirsutum GN=LOC107908295 PE=3 SV=1	100	328	0	0	1	984	1	1	328	0	0	1768	Gohir.D02G134600.1	Gohir.D02G134600	275052	38091245	Gohir.D02G134600.1.p
1575	htseq _R_13DAI	MSTRG.81468	1226.9	-1.22236	0.183229	-6.67123	2.53672e-11	4.96011e-09	D02	chr.14	47423442	47425190	-	Gohir.D02G134700	1519	O23044	Peroxidase 3 OS=Arabidopsis thaliana GN=PER3 PE=2 SV=1	66.87	317	105	1	167	1117	2	11	326	0	8.48791e-157	1162	1519	A0A1U8JSE8	Peroxidase OS=Gossypium hirsutum GN=LOC107909987 PE=3 SV=1	100	327	0	0	137	1117	2	1	327	0	0	1742	Gohir.D02G134700.1	Gohir.D02G134700	275056	38093511	Gohir.D02G134700.1.p
1005	htseq _R_5DAI	MSTRG.82116	1419.6	1.23672	0.12702	9.73645	2.10794e-22	7.28251e-19	D02	chr.14	59678845	59681416	+	Gohir.D02G161700	2037	O80763	Probable nucleoredoxin 1 OS=Arabidopsis thaliana GN=At1g60420 PE=1 SV=1	65.4	581	201	15	73	1779	1	1	578	0	0	2054	2037	A0A1U8JR80	probable nucleoredoxin 1 OS=Gossypium hirsutum GN=LOC107909674 PE=4 SV=1	99.82	570	1	0	73	1782	1	1	570	0	0	2951	Gohir.D02G161700.1	Gohir.D02G161700	276984	38093782	Gohir.D02G161700.1.p
1794	htseq _R_13DAI	MSTRG.82458	345.157	-1.18451	0.245062	-4.83352	1.34141e-06	9.82703e-05	D02	chr.14	63442890	63445280	-	Gohir.D02G175800	1963	Q9SAA9	Sterol 14-demethylase OS=Arabidopsis thaliana GN=CYP51G1 PE=1 SV=1	83.12	486	82	2	346	1797	1	3	488	0	0	2153	1963	A0A0D2RIH5	Uncharacterized protein OS=Gossypium raimondii GN=B456_005G197400 PE=3 SV=1	99.79	486	1	0	346	1803	1	1	486	0	0	2524	Gohir.D02G175800.1	Gohir.D02G175800	278426	38092826	Gohir.D02G175800.1.p
2096	htseq _R_13DAI	MSTRG.85524	101.108	1.05484	0.298106	3.53849	0.000402425	0.0126738	D03	chr.17	29777083	29778678	-	Gohir.D03G079000	3297	Q948U0	Respiratory burst oxidase homolog protein A OS=Solanum tuberosum GN=RBOHA PE=1 SV=1	81.13	965	182	38	1	2787	1	1	963	0	0	3837	3297	A0A0D2QHG4	Uncharacterized protein OS=Gossypium raimondii GN=B456_003G085100 PE=4 SV=1	99.78	929	2	0	1	2787	1	1	929	0	0	4641	Gohir.D03G079000.1	Gohir.D03G079000	287974	38078177	Gohir.D03G079000.1.p
1050	htseq _R_5DAI	MSTRG.86165	275.246	1.10564	0.189013	5.84954	4.92923e-09	1.35155e-06	D03	chr.17	40009422	40012715	-	Gohir.D03G104800	1732	O04937	Glutamate dehydrogenase A OS=Nicotiana plumbaginifolia GN=GDHA PE=2 SV=1	88.8	411	46	0	184	1416	1	1	411	0	0	2001	1732	A0A1U8NPP3	Glutamate dehydrogenase OS=Gossypium hirsutum GN=LOC107949690 PE=3 SV=1	100	411	0	0	184	1416	1	1	411	0	0	2202	Gohir.D03G104800.1	Gohir.D03G104800	289873	38079060	Gohir.D03G104800.1.p
1377	htseq _R_9DAI	MSTRG.88098	23.6151	1.61766	0.392418	4.12229	3.75126e-05	0.0187048	D04	chr.22	1894015	1899674	+	Gohir.D04G013800	1257	Q9FLC0	Peroxidase 52 OS=Arabidopsis thaliana GN=PER52 PE=2 SV=1	80.47	297	58	0	126	1016	3	28	324	0	5.00011e-169	1233	1257	A0A1U8MFL9	Peroxidase OS=Gossypium hirsutum GN=LOC107936187 PE=3 SV=1	99.69	330	1	0	27	1016	3	1	330	0	0	1597	Gohir.D04G013800.1	Gohir.D04G013800	296934	38074587	Gohir.D04G013800.1.p
2111	htseq _R_13DAI	MSTRG.88891	41.5977	-1.36798	0.391086	-3.4979	0.000468946	0.0141774	D04	chr.22	8517722	8518604	-	Gohir.D04G051000	1935	Q8LGJ5	Plant cysteine oxidase 2 OS=Arabidopsis thaliana GN=PCO2 PE=1 SV=1	62.21	262	99	15	627	1409	3	29	276	0	2.37511e-108	848	1935	A0A1U8PIX1	plant cysteine oxidase 2-like isoform X1 OS=Gossypium hirsutum GN=LOC107958793 PE=4 SV=1	100	304	0	0	501	1412	3	1	304	0	0	1519	Gohir.D04G051000.1	Gohir.D04G051000	299511	38075481	Gohir.D04G051000.1.p
1350	htseq _R_9DAI	MSTRG.90709	108.707	-1.30674	0.304474	-4.29179	1.7724e-05	0.0106901	D04	chr.22	44959525	45113827	-	Gohir.D04G126600	2005	Q9SR40	Laccase-7 OS=Arabidopsis thaliana GN=LAC7 PE=2 SV=1	59.67	553	223	16	77	1720	2	9	550	0	0	1734	2005	A0A1U8IW08	Laccase OS=Gossypium hirsutum GN=LOC107899014 PE=3 SV=1	98.92	556	6	0	53	1720	2	1	556	0	0	2876	Gohir.D04G126600.1	Gohir.D04G126600	305186	38075496	Gohir.D04G126600.1.p
1371	htseq _R_9DAI	MSTRG.91368	235.927	1.04776	0.252188	4.15469	3.25732e-05	0.0168728	D04	chr.22	52116769	52118575	+	Gohir.D04G154100	1344	Q9XIV8	Peroxidase N1 OS=Nicotiana tabacum GN=poxN1 PE=1 SV=1	72.18	302	84	1	124	1026	1	29	330	0	4.97287e-165	1210	1344	A0A0D2V566	Peroxidase OS=Gossypium raimondii GN=B456_012G141300 PE=3 SV=1	100	326	0	0	49	1026	1	1	326	0	0	1642	Gohir.D04G154100.1	Gohir.D04G154100	307188	38075456	Gohir.D04G154100.1.p
1868	htseq _R_13DAI	MSTRG.95333	162.667	-1.18241	0.265417	-4.45491	8.39267e-06	0.000493927	D05	LGD08/Chr.19	13508855	13519912	-	Gohir.D05G151600	1970	O64697	Cytochrome P450 710A1 OS=Arabidopsis thaliana GN=CYP710A1 PE=1 SV=1	66.94	475	157	5	55	1479	1	26	495	0	0	1682	1970	A0A1U8JCV7	cytochrome P450 710A1-like OS=Gossypium hirsutum GN=LOC107905878 PE=3 SV=1	100	477	0	0	55	1485	1	26	502	0	0	2493	Gohir.D05G151600.1	Gohir.D05G151600	323232	38109621	Gohir.D05G151600.1.p
1983	htseq _R_13DAI	MSTRG.96005	114.38	-1.22273	0.307297	-3.97898	6.92116e-05	0.00298115	D05	LGD08/Chr.19	16803241	16804936	-	Gohir.D05G187000	1257	Q43872	Peroxidase 64 OS=Arabidopsis thaliana GN=PER64 PE=1 SV=1	74.74	297	75	1	208	1095	1	21	317	0	5.63204e-170	1239	1257	A0A1U8JBJ8	Peroxidase OS=Gossypium hirsutum GN=LOC107905536 PE=3 SV=1	100	316	0	0	148	1095	1	1	316	0	0	1583	Gohir.D05G187000.1	Gohir.D05G187000	325795	38108793	Gohir.D05G187000.1.p
1023	htseq _R_5DAI	MSTRG.97343	801.23	1.12126	0.157884	7.1018	1.23138e-12	8.50837e-10	D05	LGD08/Chr.19	24247329	24261928	+	Gohir.D05G249800	2046	Q9FY79	Laccase-14 OS=Arabidopsis thaliana GN=LAC14 PE=2 SV=1	47.05	561	297	21	86	1735	2	19	569	0	1.98091e-179	1353	2046	A0A1U8K726	Laccase OS=Gossypium hirsutum GN=LOC107914067 PE=3 SV=1	99.82	566	1	0	47	1744	2	1	566	0	0	3035	Gohir.D05G249800.1	Gohir.D05G249800	330724	38111474	Gohir.D05G249800.1.p
2052	htseq _R_13DAI	MSTRG.97811	87.3864	-1.35615	0.363393	-3.73191	0.000190035	0.00676926	D05	LGD08/Chr.19	27125788	27127620	+	Gohir.D05G271700	3360	Q8W4A7	Putative UDP-glucuronate:xylan alpha-glucuronosyltransferase 3 OS=Arabidopsis thaliana GN=GUX3 PE=2 SV=1	73.34	574	153	18	314	2020	2	34	594	0	0	2230	3360	A0A1U8JF23	Hexosyltransferase OS=Gossypium hirsutum GN=LOC107905233 PE=3 SV=1	99.68	639	2	0	158	2074	2	1	639	0	0	3267	Gohir.D05G271700.1	Gohir.D05G271700	332170	38110666	Gohir.D05G271700.1.p
1008	htseq _R_5DAI	MSTRG.99776	203.016	1.97856	0.225001	8.79357	1.44875e-18	3.12821e-15	D05	LGD08/Chr.19	59532892	59568336	+	Gohir.D05G361100	1255	Q945B6	Probable 2-oxoglutarate-dependent dioxygenase AOP1.2 OS=Arabidopsis thaliana GN=AOP1.2 PE=2 SV=1	41.35	237	139	9	258	950	3	73	306	0	3.99702e-63	493	1255	A0A1U8J2E7	probable 2-oxoglutarate-dependent dioxygenase AOP1 OS=Gossypium hirsutum GN=LOC107902912 PE=3 SV=1	98.41	252	4	0	258	1013	3	67	318	0	1.17608e-171	1264	Gohir.D05G361100.1	Gohir.D05G361100	338161	38108686	Gohir.D05G361100.1.p
1253	htseq _R_9DAI	MSTRG.101894	308.197	1.14551	0.215658	5.31168	1.0862e-07	0.000176203	D06	chr.25	12731373	12733594	+	Gohir.D06G068200	1416	Q8H1S0	Inositol oxygenase 4 OS=Arabidopsis thaliana GN=MIOX4 PE=2 SV=1	72.87	317	86	8	287	1213	2	1	317	0	1.11066e-169	1242	1394	A0A1U8IWL6	inositol oxygenase 2-like isoform X1 OS=Gossypium hirsutum GN=LOC107901146 PE=4 SV=1	99.68	315	1	0	287	1231	2	1	315	0	0	1689	Gohir.D06G068200.1	Gohir.D06G068200	345067	38102183	Gohir.D06G068200.1.p
1907	htseq _R_13DAI	MSTRG.103260	178.748	1.09882	0.256641	4.28153	1.85609e-05	0.000971995	D06	chr.25	39792294	39794243	-	Gohir.D06G122600	1572	Q93ZA3	Berberine bridge enzyme-like 13 OS=Arabidopsis thaliana GN=At1g30760 PE=1 SV=1	68.17	509	162	8	55	1569	1	30	534	0	0	1731	1572	A0A0D2UCJ6	Uncharacterized protein OS=Gossypium raimondii GN=B456_010G142800 PE=3 SV=1	98.66	523	7	0	1	1569	1	7	529	0	0	2577	Gohir.D06G122600.1	Gohir.D06G122600	350109	38103699	Gohir.D06G122600.1.p
2154	htseq _R_13DAI	MSTRG.103761	46.1976	-1.34208	0.399016	-3.36347	0.000769687	0.020836	D06	chr.25	54062071	54063000	-	Gohir.D06G143800	2033	Q9C7S7	Endoplasmic reticulum oxidoreductin-1 OS=Arabidopsis thaliana GN=AERO1 PE=1 SV=1	71.52	425	121	3	318	1586	3	18	441	0	0	1647	2102	A0A1U8J5Q1	endoplasmic reticulum oxidoreductin-1-like OS=Gossypium hirsutum GN=LOC107901876 PE=4 SV=1	99.78	463	1	0	270	1658	3	1	463	0	0	2502	Gohir.D06G143800.1	Gohir.D06G143800	351287	38101644	Gohir.D06G143800.1.p
1096	htseq _R_5DAI	MSTRG.107427	162.575	1.09157	0.233331	4.67821	2.89388e-06	0.000331053	D07	chr.16	11400092	11428804	-	Gohir.D07G090100	1371	Q08507	1-aminocyclopropane-1-carboxylate oxidase 3 OS=Petunia hybrida GN=ACO3 PE=3 SV=1	81.93	310	56	1	88	1014	1	1	310	0	2.74573e-167	1225	1371	Q2PT74	1-aminocyclopropane-1-carboxylate oxidase OS=Gossypium hirsutum GN=ACO1 PE=2 SV=1	99.35	311	2	0	88	1020	1	1	311	0	0	1448	Gohir.D07G090100.1	Gohir.D07G090100	.	38138723	Gohir.D07G090100.1.p
1056	htseq _R_5DAI	MSTRG.109725	174.756	1.30711	0.230039	5.68212	1.33036e-08	3.28294e-06	D07	chr.16	46699941	46702367	-	Gohir.D07G187900	1976	Q2QYH7	Cytochrome P450 714C2 OS=Oryza sativa subsp. japonica GN=CYP714C2 PE=2 SV=1	49.9	513	257	12	255	1775	3	16	522	0	7.40652e-179	1342	1976	A0A1U8P4D0	cytochrome P450 714C2-like OS=Gossypium hirsutum GN=LOC107954904 PE=3 SV=1	100	516	0	0	228	1775	3	1	516	0	0	2652	Gohir.D07G187900.1	Gohir.D07G187900	371299	38138818	Gohir.D07G187900.1.p
2210	htseq _R_13DAI	MSTRG.109975	61.8225	-1.15616	0.363054	-3.18454	0.00144987	0.0339414	D07	chr.16	51139918	51140821	-	Gohir.D07G199000	1593	Q6J540	Isoleucine N-monooxygenase 2 OS=Lotus japonicus GN=CYP79D4 PE=1 SV=1	53.28	533	249	45	79	1566	1	7	531	0	3.20427e-179	1333	1593	A0A1U8P9H6	isoleucine N-monooxygenase 2-like OS=Gossypium hirsutum GN=LOC107956795 PE=3 SV=1	93.61	548	35	30	37	1590	1	1	548	0	0	2549	Gohir.D07G199000.1	Gohir.D07G199000	371842	38138507	Gohir.D07G199000.1.p
1104	htseq _R_5DAI	MSTRG.113446	140.441	1.03574	0.229402	4.51494	6.33349e-06	0.000651219	D08	LGD03/Chr.24	37533192	37537261	-	Gohir.D08G116600	1561	Q9FLV0	Protein DOWNY MILDEW RESISTANCE 6 OS=Arabidopsis thaliana GN=DMR6 PE=1 SV=1	69.96	253	76	0	195	953	3	1	253	0	5.86109e-145	1012	1561	A0A0D2MXF3	Uncharacterized protein OS=Gossypium raimondii GN=B456_004G125500 PE=3 SV=1	97.62	253	6	0	195	953	3	1	253	0	0	1328	Gohir.D08G116600.1	Gohir.D08G116600	384715	38130351	Gohir.D08G116600.1.p
1878	htseq _R_13DAI	MSTRG.114588	972.168	-1.05791	0.240191	-4.40443	1.06064e-05	0.00060561	D08	LGD03/Chr.24	54967472	54970071	+	Gohir.D08G169900	1908	Q949P1	Abscisic acid 8&apos;-hydroxylase 1 OS=Arabidopsis thaliana GN=CYP707A1 PE=2 SV=1	82.17	432	77	3	197	1492	2	34	462	0	0	1954	1908	A0A0D2S1H7	Uncharacterized protein (Fragment) OS=Gossypium raimondii GN=B456_004G177200 PE=3 SV=1	99.17	483	4	0	47	1495	2	13	495	0	0	2437	Gohir.D08G169900.1	Gohir.D08G169900	388403	38131346	Gohir.D08G169900.1.p
1973	htseq _R_13DAI	MSTRG.115735	167.977	-1.06984	0.263764	-4.05606	4.99075e-05	0.00222732	D08	LGD03/Chr.24	64296235	64298731	+	Gohir.D08G220300	1925	Q9LYQ2	Laccase-13 OS=Arabidopsis thaliana GN=LAC13 PE=2 SV=1	75.64	546	133	4	103	1728	1	24	569	0	0	2117	1925	A0A0D2R9F6	Laccase OS=Gossypium raimondii GN=B456_004G234200 PE=3 SV=1	99.3	576	4	0	1	1728	1	1	576	0	0	2804	Gohir.D08G220300.1	Gohir.D08G220300	.	38131767	Gohir.D08G220300.1.p
1960	htseq _R_13DAI	MSTRG.116362	731.149	1.01881	0.248553	4.09896	4.15008e-05	0.00190532	D08	LGD03/Chr.24	67720189	67721860	+	Gohir.D08G249300	1146	Q42578	Peroxidase 53 OS=Arabidopsis thaliana GN=PER53 PE=1 SV=1	60.19	309	123	6	84	995	3	26	333	0	1.69353e-119	904	1146	A0A0D2S6N2	Peroxidase OS=Gossypium raimondii GN=B456_004G265900 PE=3 SV=1	100	322	0	0	30	995	3	1	322	0	0	1561	Gohir.D08G249300.1	Gohir.D08G249300	.	38130159	Gohir.D08G249300.1.p
1076	htseq _R_5DAI	MSTRG.117948	346.624	-1.00585	0.201672	-4.98757	6.11442e-07	9.96419e-05	D09	chr.23	18356049	18358884	+	Gohir.D09G043700	2385	Q8W110	Ferric reduction oxidase 4 OS=Arabidopsis thaliana GN=FRO4 PE=2 SV=1	61.02	703	274	21	100	2175	1	5	697	0	0	1985	2385	A0A0H3YG72	NADPH oxidase (Fragment) OS=Gossypium hirsutum GN=LOC107951281 PE=2 SV=1	100	697	0	0	91	2181	1	1	697	0	0	3340	Gohir.D09G043700.1	Gohir.D09G043700	400378	38126119	Gohir.D09G043700.1.p
1249	htseq _R_9DAI	MSTRG.120981	326.643	-1.20168	0.222653	-5.39709	6.7731e-08	0.000119427	D09	chr.23	46968121	46983387	-	Gohir.D09G175200	1801	Q9SVG5	Berberine bridge enzyme-like 18 OS=Arabidopsis thaliana GN=At4g20820 PE=3 SV=1	51.29	540	263	24	25	1614	1	1	526	0	1.71628e-177	1328	1801	A0A0D2QDC1	Uncharacterized protein OS=Gossypium raimondii GN=B456_006G197300 PE=3 SV=1	99.62	539	2	0	25	1641	1	1	539	0	0	2738	Gohir.D09G175200.1	Gohir.D09G175200	411207	38124287	Gohir.D09G175200.1.p
1357	htseq _R_9DAI	MSTRG.121269	36.9923	1.58947	0.374088	4.24891	2.14811e-05	0.0122126	D09	chr.23	48211519	48213712	+	Gohir.D09G188400	1836	Q8VWZ7	Geraniol 8-hydroxylase OS=Catharanthus roseus GN=CYP76B6 PE=1 SV=1	57.84	465	196	2	203	1597	2	28	490	0	0	1475	1836	A0A0D2NW85	Uncharacterized protein OS=Gossypium raimondii GN=B456_006G211100 PE=3 SV=1	98.96	482	5	0	161	1606	2	19	500	0	0	2541	Gohir.D09G188400.1	Gohir.D09G188400	412162	38124987	Gohir.D09G188400.1.p
1009	htseq _R_5DAI	MSTRG.122585	112.09	2.22312	0.259195	8.57702	9.73618e-18	1.8687e-14	D10	chr.20	574597	606525	+	Gohir.D10G006400	1539	Q9FZC8	Berberine bridge enzyme-like 7 OS=Arabidopsis thaliana GN=FOX5 PE=3 SV=1	53.84	494	228	11	64	1527	1	21	509	0	1.56397e-163	1227	1539	A0A0D2UKC7	Uncharacterized protein OS=Gossypium raimondii GN=B456_011G007300 PE=3 SV=1	96.95	492	15	3	64	1530	1	22	513	0	0	2380	Gohir.D10G006400.1	Gohir.D10G006400	417594	38113152	Gohir.D10G006400.1.p
1300	htseq _R_9DAI	MSTRG.123907	156.009	1.22267	0.258981	4.72107	2.34612e-06	0.00221272	D10	chr.20	7053764	7054748	+	Gohir.D10G067100	2492	Q9CA83	NADP-dependent malic enzyme 4, chloroplastic OS=Arabidopsis thaliana GN=NADP-ME4 PE=1 SV=1	78.58	649	139	7	223	2157	1	1	646	0	0	2535	2492	A0A0D2UP01	Malic enzyme OS=Gossypium raimondii GN=B456_011G071400 PE=3 SV=1	99.53	646	3	1	223	2157	1	1	646	0	0	3233	Gohir.D10G067100.1	Gohir.D10G067100	422771	38114508	Gohir.D10G067100.1.p
2212	htseq _R_13DAI	MSTRG.123907	59.7183	1.13752	0.357911	3.17821	0.00148188	0.034446	D10	chr.20	8772212	8773185	-	Gohir.D10G074200	2492	Q9CA83	NADP-dependent malic enzyme 4, chloroplastic OS=Arabidopsis thaliana GN=NADP-ME4 PE=1 SV=1	78.58	649	139	7	223	2157	1	1	646	0	0	2535	2492	A0A0D2UP01	Malic enzyme OS=Gossypium raimondii GN=B456_011G071400 PE=3 SV=1	99.53	646	3	1	223	2157	1	1	646	0	0	3233	Gohir.D10G067100.1	Gohir.D10G067100	422771	38114508	Gohir.D10G067100.1.p
1214	htseq _R_9DAI	MSTRG.124791	182.935	1.5655	0.243209	6.43685	1.2198e-10	4.94689e-07	D10	chr.20	18363269	18365175	-	Gohir.D10G110500	1896	Q9SVG5	Berberine bridge enzyme-like 18 OS=Arabidopsis thaliana GN=At4g20820 PE=3 SV=1	49.31	511	259	12	95	1627	2	29	527	0	2.99901e-162	1230	1896	A0A0D2US10	Uncharacterized protein OS=Gossypium raimondii GN=B456_011G121800 PE=3 SV=1	99.63	543	2	0	5	1633	2	1	543	0	0	2643	Gohir.D10G110500.1	Gohir.D10G110500	426336	38113420	Gohir.D10G110500.1.p
1062	htseq _R_5DAI	MSTRG.127057	145.831	1.27961	0.238135	5.37344	7.72493e-08	1.64741e-05	D10	chr.20	59066085	59084058	-	Gohir.D10G204400	1681	O65271	Bifunctional protein FolD 4, chloroplastic OS=Arabidopsis thaliana GN=FOLD4 PE=1 SV=1	73.2	362	97	2	197	1282	2	1	360	0	0	1375	1727	A0A1U8KHA1	bifunctional protein FolD 4, chloroplastic-like isoform X1 OS=Gossypium hirsutum GN=LOC107915702 PE=3 SV=1	100	362	0	0	197	1282	2	1	362	0	0	1910	Gohir.D10G204400.1	Gohir.D10G204400	433410	38113775	Gohir.D10G204400.1.p
2113	htseq _R_13DAI	MSTRG.127539	93.1436	1.09675	0.314001	3.49283	0.000477933	0.0143692	D10	chr.20	63729751	63730892	+	Gohir.D10G226400	.	.	.	.	.	.	.	.	.	.	.	.	.	.	.	1039	A0A0D2RT08	Uncharacterized protein OS=Gossypium raimondii GN=B456_011G257500 PE=4 SV=1	100	192	0	0	43	618	1	1	192	0	4.65656e-139	1029	Gohir.D10G226400.1	Gohir.D10G226400	435163	38113532	Gohir.D10G226400.1.p
1111	htseq _R_5DAI	MSTRG.128003	104.252	1.12468	0.258316	4.35391	1.3373e-05	0.00120315	D10	chr.20	67445246	67447971	-	Gohir.D10G249700	2041	Q9SIY8	Laccase-5 OS=Arabidopsis thaliana GN=LAC5 PE=2 SV=1	77.2	579	132	11	44	1756	2	5	580	0	0	2410	2041	A0A1U8M0J7	Laccase OS=Gossypium hirsutum GN=LOC107931759 PE=3 SV=1	99.82	569	1	0	50	1756	2	1	569	0	0	3055	Gohir.D10G249700.1	Gohir.D10G249700	436291	38112594	Gohir.D10G249700.1.p
1028	htseq _R_5DAI	MSTRG.128258	433.4	1.29708	0.190968	6.79213	1.10487e-11	5.96422e-09	D11	LGD02/Chr.21	674395	676268	+	Gohir.D11G007200	1784	O64638	Cytochrome P450 76C3 OS=Arabidopsis thaliana GN=CYP76C3 PE=2 SV=2	35.22	457	296	15	226	1572	1	59	508	0	1.4497e-84	706	1784	A0A1U8JE80	cytochrome P450 76C1-like OS=Gossypium hirsutum GN=LOC107904637 PE=3 SV=1	100	532	0	0	1	1596	1	1	532	0	0	2607	Gohir.D11G007200.1	Gohir.D11G007200	437420	38080286	Gohir.D11G007200.1.p
2011	htseq _R_13DAI	MSTRG.131418	117.672	1.17278	0.302813	3.87294	0.000107529	0.00427272	D11	LGD02/Chr.21	16719397	16720999	+	Gohir.D11G159500	1265	Q9MB94	1-aminocyclopropane-1-carboxylate oxidase OS=Prunus mume GN=ACO1 PE=2 SV=1	78.31	309	67	0	75	1001	3	1	309	0	0	1370	1265	A0A1U8K1J8	1-aminocyclopropane-1-carboxylate oxidase-like OS=Gossypium hirsutum GN=LOC107912629 PE=3 SV=1	100	310	0	0	75	1004	3	1	310	0	0	1676	Gohir.D11G159500.1	Gohir.D11G159500	449262	38079721	Gohir.D11G159500.1.p
1760	htseq _R_13DAI	MSTRG.133554	214.911	-1.32602	0.266438	-4.97686	6.46245e-07	5.29045e-05	D11	LGD02/Chr.21	51513718	51516388	+	Gohir.D11G242400	1442	Q8LGJ5	Plant cysteine oxidase 2 OS=Arabidopsis thaliana GN=PCO2 PE=1 SV=1	49.55	224	113	13	373	1026	1	22	238	0	1.92657e-65	548	1442	A0A1U8KAX3	plant cysteine oxidase 2-like OS=Gossypium hirsutum GN=LOC107913639 PE=4 SV=1	100	283	0	0	286	1134	1	1	283	0	0	1433	Gohir.D11G242400.1	Gohir.D11G242400	455657	38083207	Gohir.D11G242400.1.p
1924	htseq _R_13DAI	MSTRG.136084	72.9173	-1.42552	0.338088	-4.21643	2.48203e-05	0.00125389	D12	chr.26	863219	864750	+	Gohir.D12G007300	1183	Q9SUT2	Peroxidase 39 OS=Arabidopsis thaliana GN=PER39 PE=1 SV=1	51.37	327	159	5	1	969	1	1	326	0	8.67772e-106	814	1183	A0A1U8ME80	Peroxidase OS=Gossypium hirsutum GN=LOC107936875 PE=3 SV=1	100	323	0	0	1	969	1	1	323	0	0	1656	Gohir.D12G007300.1	Gohir.D12G007300	463743	38099528	Gohir.D12G007300.1.p
1380	htseq _R_9DAI	MSTRG.137289	118.178	-1.274	0.31039	-4.1045	4.05193e-05	0.0196741	D12	chr.26	11109440	11112228	-	Gohir.D12G062700	1693	Q9FH76	Abscisic acid 8&apos;-hydroxylase 3 OS=Arabidopsis thaliana GN=CYP707A3 PE=1 SV=1	30.13	438	306	17	148	1455	1	38	460	0	1.04969e-68	591	1693	A0A1U8N913	abscisic acid 8&apos;-hydroxylase 3-like OS=Gossypium hirsutum GN=LOC107945830 PE=3 SV=1	100	489	0	0	1	1467	1	1	489	0	0	2621	Gohir.D12G062700.1	Gohir.D12G062700	468091	38099994	Gohir.D12G062700.1.p
1030	htseq _R_5DAI	MSTRG.144380	417.509	1.34852	0.202993	6.64318	3.06981e-11	1.55964e-08	D13	chr.18	37492804	37495866	-	Gohir.D13G111000	3015	Q43191	Probable linoleate 9S-lipoxygenase 5 OS=Solanum tuberosum GN=LOX1.5 PE=2 SV=1	74.21	865	223	4	186	2780	3	2	862	0	0	3443	3015	Q93WZ2	Lipoxygenase OS=Gossypium hirsutum GN=Lox1 PE=2 SV=3	100	865	0	0	186	2780	3	1	865	0	0	4536	Gohir.D13G111000.1	Gohir.D13G111000	492791	38141996	Gohir.D13G111000.1.p
1951	htseq _R_13DAI	MSTRG.145559	115.815	1.33029	0.3225	4.12492	3.70862e-05	0.00174087	D13	chr.18	54251768	54261265	-	Gohir.D13G160500	1071	Q9C899	Feruloyl CoA ortho-hydroxylase 2 OS=Arabidopsis thaliana GN=F6&apos;H2 PE=1 SV=1	62.32	361	136	5	1	1068	1	1	361	0	1.29465e-168	1227	1071	A0A0D2W788	Uncharacterized protein OS=Gossypium raimondii GN=B456_013G181200 PE=3 SV=1	96.37	359	13	3	1	1068	1	1	359	0	0	1826	Gohir.D13G160500.1	Gohir.D13G160500	.	38140917	Gohir.D13G160500.1.p
1233	htseq _R_9DAI	MSTRG.146662	319.269	-1.40422	0.245143	-5.72816	1.01526e-08	2.48586e-05	D13	chr.18	61416617	61420217	+	Gohir.D13G209700	1070	Q945B6	Probable 2-oxoglutarate-dependent dioxygenase AOP1.2 OS=Arabidopsis thaliana GN=AOP1.2 PE=2 SV=1	40.14	284	170	12	99	932	3	12	289	0	4.44441e-56	479	1070	A0A0D2U630	Uncharacterized protein OS=Gossypium raimondii GN=B456_013G238800 PE=3 SV=1	99.69	329	1	0	81	1067	3	1	329	0	0	1502	Gohir.D13G209700.1	Gohir.D13G209700	500517	38142562	Gohir.D13G209700.1.p
1861	htseq _R_13DAI	MSTRG.146667	315.319	-1.14592	0.25547	-4.48553	7.27335e-06	0.00043832	D13	chr.18	61453614	61456486	+	Gohir.D13G209900	1297	Q9ZTA3	Probable 2-oxoglutarate-dependent dioxygenase AOP1 OS=Arabidopsis thaliana GN=AOP1 PE=2 SV=1	36.89	290	183	12	71	919	2	9	293	0	5.79644e-64	538	1297	A0A1U8MV27	probable 2-oxoglutarate-dependent dioxygenase AOP1 OS=Gossypium hirsutum GN=LOC107941629 PE=3 SV=1	100	323	0	0	62	1030	2	1	323	0	0	1655	Gohir.D13G209900.1	Gohir.D13G209900	500523	38142463	Gohir.D13G209900.1.p
1216	htseq _R_9DAI	MSTRG.146671	1017.74	1.38565	0.216933	6.38745	1.68676e-10	6.4131e-07	D13	chr.18	61486886	61518514	+	Gohir.D13G210200	1350	Q9ZTA3	Probable 2-oxoglutarate-dependent dioxygenase AOP1 OS=Arabidopsis thaliana GN=AOP1 PE=2 SV=1	37.75	294	183	12	94	954	1	13	301	0	7.82516e-67	559	1350	A0A1U8MYL8	2-oxoglutarate-dependent dioxygenase AOP2-like OS=Gossypium hirsutum GN=LOC107941626 PE=3 SV=1	99.32	298	2	0	73	966	1	1	298	0	0	1603	Gohir.D13G210200.1	Gohir.D13G210200	.	38142414	Gohir.D13G210200.1.p
2238	htseq _R_13DAI	MSTRG.146678	59.5812	1.37522	0.449636	3.05851	0.00222438	0.0474167	D13	chr.18	61754536	61755020	+	Gohir.D13G210600	1191	Q9ZTA3	Probable 2-oxoglutarate-dependent dioxygenase AOP1 OS=Arabidopsis thaliana GN=AOP1 PE=2 SV=1	37.97	287	178	17	66	896	3	12	291	0	1.70636e-61	518	1191	A0A0D2W8Z6	Uncharacterized protein OS=Gossypium raimondii GN=B456_013G240200 PE=3 SV=1	99.08	327	3	0	48	1028	3	1	327	0	0	1658	Gohir.D13G210600.1	Gohir.D13G210600	500549	38141849	Gohir.D13G210600.1.p
[truncated: 9 more columns]

## Sheet: FoldChange heatmap
Gene Name	Res-5dai	Res-9dai	Res-13dai	Sus-5dai	Sus-9dai	Sus-13dai
Gohir.D10G249700	1.12468	-0.415616	0.360796	0.783402	0.0491467	-0.0777258	.
Gohir.A07G010400	0.158602	0.126955	-1.71998	-0.29578	0.194723	-0.207659	1-aminocyclopropane-1-carboxylate oxidase 1 OS=Arabidopsis thaliana GN=ACO1 PE=2 SV=1
Gohir.A07G084000	0.512823	1.14207	0.304715	0.652723	0.18804	-0.390674	1-aminocyclopropane-1-carboxylate oxidase 1 OS=Petunia hybrida GN=ACO1 PE=1 SV=1
Gohir.D07G090100	1.09157	0.711802	0.513112	0.634924	-0.0189224	-0.378687	1-aminocyclopropane-1-carboxylate oxidase 3 OS=Petunia hybrida GN=ACO3 PE=3 SV=1
Gohir.D02G078600	-1.09521	-0.641331	-0.830083	-0.569821	0.0235975	0.724063	1-aminocyclopropane-1-carboxylate oxidase 5 OS=Arabidopsis thaliana GN=At1g77330 PE=2 SV=1
Gohir.A02G037500	0.36	0.47	1.13	0.12	0.18	-0.37	1-aminocyclopropane-1-carboxylate oxidase homolog 1 OS=Arabidopsis thaliana GN=At1g06620 PE=2 SV=1
Gohir.D11G242400	0.107147	0.34832	-1.32602	-0.356192	0.0707096	-0.638378	1-aminocyclopropane-1-carboxylate oxidase OS=Prunus mume GN=ACO1 PE=2 SV=1
Gohir.A10G176000	1.11506	1.51424	-0.195251	0.282145	0.184138	0.273923	1-Cys peroxiredoxin OS=Medicago truncatula PE=2 SV=1
Gohir.A09G125900	-0.660215	-0.500265	-1.64813	0.435705	-0.283804	-0.186637	3,9-dihydroxypterocarpan 6A-monooxygenase OS=Glycine max GN=CYP93A1 PE=1 SV=1
Gohir.D01G185200	-0.208492	0.164635	-1.59221	0.604408	-0.121866	-0.114066	3,9-dihydroxypterocarpan 6A-monooxygenase OS=Glycine max GN=CYP93A1 PE=1 SV=1
Gohir.A09G125800	-0.374248	-0.0922353	-1.12503	0.0912221	0.110713	0.297586	3,9-dihydroxypterocarpan 6A-monooxygenase OS=Glycine max GN=CYP93A1 PE=1 SV=1
Gohir.A01G195100	-0.15	-0.69	-1.05	0.63	-0.05	0.52	3,9-dihydroxypterocarpan 6A-monooxygenase OS=Glycine max GN=CYP93A1 PE=1 SV=1
Gohir.D08G169900	0.105287	-0.792226	-1.05791	0.29973	-0.888653	-0.933528	Abscisic acid 8&apos;-hydroxylase 1 OS=Arabidopsis thaliana GN=CYP707A1 PE=2 SV=1
Gohir.D13G111000	1.34852	1.08447	-0.158779	0.924739	0.230595	-0.827672	Abscisic acid 8&apos;-hydroxylase 3 OS=Arabidopsis thaliana GN=CYP707A3 PE=1 SV=1
Gohir.D02G072500	0.318	0.156123	-1.49792	-0.175274	0.234996	-0.59298	Alcohol dehydrogenase class-P OS=Arabidopsis thaliana GN=ADH1 PE=1 SV=2
Gohir.A01G189900	1.78	1.23	2.68	0.01	0.46	-0.24	Alcohol dehydrogenase class-P OS=Arabidopsis thaliana GN=ADH1 PE=1 SV=2
Gohir.D06G122600	0.701289	0.601222	1.09882	0.408372	0.241566	0.358814	Berberine bridge enzyme-like 13 OS=Arabidopsis thaliana GN=At1g30760 PE=1 SV=1
Gohir.D09G175200	-0.411407	-1.20168	-0.799907	-0.566814	-0.00964531	-0.655299	Berberine bridge enzyme-like 18 OS=Arabidopsis thaliana GN=At4g20820 PE=3 SV=1
Gohir.A09G180300	-0.600165	-1.093	-0.282624	-0.612046	-0.185414	-0.525031	Berberine bridge enzyme-like 18 OS=Arabidopsis thaliana GN=At4g20820 PE=3 SV=1
Gohir.D10G204400	1.27961	1.22298	0.588174	0.355762	0.127562	0.153367	Berberine bridge enzyme-like 18 OS=Arabidopsis thaliana GN=At4g20820 PE=3 SV=1
Gohir.A10G155400	0.785915	1.34568	0.882464	0.416711	0.511686	-0.312846	Berberine bridge enzyme-like 18 OS=Arabidopsis thaliana GN=At4g20820 PE=3 SV=1
Gohir.D10G006400	2.22312	1.25688	1.79975	1.04538	0.211633	1.0901	Berberine bridge enzyme-like 7 OS=Arabidopsis thaliana GN=FOX5 PE=3 SV=1
Gohir.A10G006400	1.55537	1.9226	1.94986	0.955017	0.479317	0.230594	Berberine bridge enzyme-like 7 OS=Arabidopsis thaliana GN=FOX5 PE=3 SV=1
Gohir.D10G226400	1.13339	0.805898	1.09675	0.671149	0.217824	0.268236	Bifunctional protein FolD 4, chloroplastic OS=Arabidopsis thaliana GN=FOLD4 PE=1 SV=1
Gohir.D02G019600	0.498623	1.00534	0.704428	0.45154	0.279614	-0.121559	Cannabidiolic acid synthase-like 1 OS=Cannabis sativa GN=CBDAS2 PE=2 SV=1
Gohir.D02G019300	0.694472	1.01266	1.32431	0.10293	0.0452366	-0.194761	Cannabidiolic acid synthase-like 1 OS=Cannabis sativa GN=CBDAS2 PE=2 SV=1
Gohir.A08G203900	1.52899	1.63217	1.25852	0.127173	0.42603	0.976858	Cationic peroxidase 1 OS=Arachis hypogaea GN=PNC1 PE=1 SV=2
Gohir.D05G151600	-0.298483	-0.766718	-1.18241	0.0242076	-0.22796	0.00400106	Cytochrome P450 710A1 OS=Arabidopsis thaliana GN=CYP710A1 PE=1 SV=1
Gohir.D07G187900	1.30711	0.625653	0.905804	0.28299	0.31305	0.32485	Cytochrome P450 714C2 OS=Oryza sativa subsp. japonica GN=CYP714C2 PE=2 SV=1
Gohir.D02G005200	-0.088919	0.317515	1.31776	-0.251341	-0.156265	0.297797	Cytochrome P450 71D10 OS=Glycine max GN=CYP71D10 PE=2 SV=1
Gohir.D11G159500	0.967318	0.855502	1.17278	0.130821	0.351378	1.11103	Cytochrome P450 76C3 OS=Arabidopsis thaliana GN=CYP76C3 PE=2 SV=2
Gohir.A05G262800	0.891799	0.733938	1.05666	0.382874	0.244934	-0.0337358	Cytochrome P450 81E8 OS=Medicago truncatula GN=CYP81E8 PE=2 SV=1
Gohir.A09G047200	1.26524	1.06576	0.765708	0.94562	0.433663	0.3154	Cytochrome P450 CYP736A12 OS=Panax ginseng PE=2 SV=1
Gohir.A10G114200	0.69358	-0.149896	-2.17562	-0.188346	0.116028	0.221872	Cytochrome P450 CYP73A100 OS=Panax ginseng PE=2 SV=1
Gohir.D06G143800	0.11623	-0.0295819	-1.34208	-0.394488	0.319528	-0.34346	Endoplasmic reticulum oxidoreductin-1 OS=Arabidopsis thaliana GN=AERO1 PE=1 SV=1
Gohir.D09G043700	-1.00585	-0.540642	-0.288055	-0.069665	0.234187	-0.0881933	Ferric reduction oxidase 4 OS=Arabidopsis thaliana GN=FRO4 PE=2 SV=1
Gohir.A13G155600	-0.071841	0.426492	1.10442	-0.185179	-0.0635386	-0.343825	Feruloyl CoA ortho-hydroxylase 1 OS=Arabidopsis thaliana GN=F6&apos;H1 PE=1 SV=1
Gohir.D13G209700	0.374779	-1.40422	-1.10558	0.140596	0.265014	-0.0758667	Feruloyl CoA ortho-hydroxylase 2 OS=Arabidopsis thaliana GN=F6&apos;H2 PE=1 SV=1
Gohir.D09G188400	0.860273	1.58947	0.861892	0.422146	0.725438	0.174916	Geraniol 8-hydroxylase OS=Catharanthus roseus GN=CYP76B6 PE=1 SV=1
Gohir.A03G061200	0.14	1.09	0.53	0.31	0.25	-0.71	Glutamate dehydrogenase 2 OS=Arabidopsis thaliana GN=GDH2 PE=1 SV=1
Gohir.D03G104800	1.10564	0.657036	0.440728	1.00412	0.307833	-0.549332	Glutamate dehydrogenase A OS=Nicotiana plumbaginifolia GN=GDHA PE=2 SV=1
Gohir.D06G068200	0.144839	1.14551	0.957695	0.408753	-0.0490938	-0.417631	Inositol oxygenase 4 OS=Arabidopsis thaliana GN=MIOX4 PE=2 SV=1
Gohir.D07G199000	0.176492	0.183385	-1.15616	0.17036	0.251242	0.129996	Isoleucine N-monooxygenase 2 OS=Lotus japonicus GN=CYP79D4 PE=1 SV=1
Gohir.A05G249500	1.01333	-0.162137	-0.646128	0.512568	-0.201321	-1.1406	Laccase-14 OS=Arabidopsis thaliana GN=LAC14 PE=2 SV=1
Gohir.D05G249800	1.12126	0.0855593	-0.388358	0.454702	-0.24587	-1.11644	Laccase-14 OS=Arabidopsis thaliana GN=LAC14 PE=2 SV=1
Gohir.A05G271700	1.53325	0.792289	1.45334	0.971068	0.479819	0.130035	Laccase-14 OS=Arabidopsis thaliana GN=LAC14 PE=2 SV=1
Gohir.D11G007200	1.29708	1.28331	0.40811	1.16532	0.476357	0.502281	Laccase-5 OS=Arabidopsis thaliana GN=LAC5 PE=2 SV=1
Gohir.A10G237900	1.49416	-0.0427282	0.510487	0.86406	0.272701	0.26859	Laccase-5 OS=Arabidopsis thaliana GN=LAC5 PE=2 SV=1
Gohir.D08G220300	-0.46748	-0.0687467	-1.06984	-0.181877	-0.0339739	-0.317008	Laccase-13 OS=Arabidopsis thaliana GN=LAC13 PE=2 SV=1
Gohir.A04G086500	0.05	-1.51	-1.11	-0.26	-0.29	-0.82	Laccase-7 OS=Arabidopsis thaliana GN=LAC7 PE=2 SV=1
Gohir.D04G126600	-0.114676	-1.30674	-0.933006	-0.0888126	-0.38485	-1.07175	Laccase-7 OS=Arabidopsis thaliana GN=LAC7 PE=2 SV=1
Gohir.A05G255000	0.38737	0.0465132	1.054	0.172965	-0.229308	0.163633	L-ascorbate oxidase homolog OS=Brassica napus GN=Bp10 PE=2 SV=1
Gohir.D10G074200	-0.00701807	1.22267	1.13752	0.125566	0.0896935	-0.329941	NADP-dependent malic enzyme 4, chloroplastic OS=Arabidopsis thaliana GN=NADP-ME4 PE=1 SV=1
Gohir.D10G110500	0.612226	1.5655	1.68914	0.345949	0.429471	0.230637	NADP-dependent malic enzyme 4, chloroplastic OS=Arabidopsis thaliana GN=NADP-ME4 PE=1 SV=1
Gohir.A04G091900	0.136968	0.155842	1.24291	-0.00259512	0.0210727	-0.822204	Omega-3 fatty acid desaturase, chloroplastic OS=Ricinus communis GN=FAD7A-1 PE=2 SV=1
Gohir.A08G083500	-0.322349	-0.457215	-1.14995	-0.332036	0.0741454	-0.0392264	Peroxidase 16 OS=Arabidopsis thaliana GN=PER16 PE=1 SV=2
Gohir.D02G134600	-0.854873	-0.627882	-1.69622	-0.335706	0.301004	-0.245425	Peroxidase 27 OS=Arabidopsis thaliana GN=PER27 PE=1 SV=1
Gohir.A12G156000	-0.184746	-0.22593	-1.42427	0.18559	0.462352	0.0776082	Peroxidase 27 OS=Arabidopsis thaliana GN=PER27 PE=1 SV=1
Gohir.D02G134700	-0.562127	-0.463853	-1.22236	-0.114998	-0.203798	-0.919725	Peroxidase 3 OS=Arabidopsis thaliana GN=PER3 PE=2 SV=1
Gohir.A03G110100	-0.79	-0.34	-1.04	-0.17	-0.12	-0.66	Peroxidase 3 OS=Arabidopsis thaliana GN=PER3 PE=2 SV=1
Gohir.A12G008200	-0.330109	-0.70367	-1.39387	-0.336046	0.195751	-0.199338	Peroxidase 39 OS=Arabidopsis thaliana GN=PER39 PE=1 SV=1
Gohir.D12G062700	0.0395587	-1.274	-0.759009	-0.167558	0.0570958	0.345557	Peroxidase 39 OS=Arabidopsis thaliana GN=PER39 PE=1 SV=1
Gohir.D05G187000	-0.643895	-0.298333	-1.22273	-0.253776	0.170521	0.397176	Peroxidase 64 OS=Arabidopsis thaliana GN=PER64 PE=1 SV=1
Gohir.A05G280000	1.47668	1.44096	0.252566	1.87854	1.28903	0.648544	Peroxidase 4 OS=Vitis vinifera GN=GSVIVT00023967001 PE=1 SV=1
Gohir.D04G013800	0.380524	1.61766	0.529875	0.844517	0.849653	1.57305	Peroxidase 52 OS=Arabidopsis thaliana GN=PER52 PE=2 SV=1
Gohir.A05G401800	2.21354	2.4876	0.587735	1.66837	1.45347	2.05207	Peroxidase 52 OS=Arabidopsis thaliana GN=PER52 PE=2 SV=1
Gohir.D08G249300	-0.0574886	0.249405	1.01881	-0.736079	-0.366693	0.406727	Peroxidase 53 OS=Arabidopsis thaliana GN=PER53 PE=1 SV=1
Gohir.A08G229000	0.0629765	0.892857	1.57016	-0.866914	-0.288417	0.305973	Peroxidase 53 OS=Arabidopsis thaliana GN=PER53 PE=1 SV=1
Gohir.D04G154100	0.430256	1.04776	2.07593	0.0692187	0.330506	0.648824	Peroxidase N1 OS=Nicotiana tabacum GN=poxN1 PE=1 SV=1
Gohir.A05G132000	-0.0557108	-0.0515392	-1.30212	0.0520836	0.429189	-0.142832	Peroxiredoxin-2B OS=Arabidopsis thaliana GN=PRXIIB PE=1 SV=1
Gohir.A11G231100	-0.399837	-0.0290712	-1.42715	-0.632419	0.102081	-0.802424	Plant cysteine oxidase 2 OS=Arabidopsis thaliana GN=PCO2 PE=1 SV=1
Gohir.D12G007300	-0.496446	-0.311606	-1.42552	-0.31834	-0.0550635	-0.177631	Plant cysteine oxidase 2 OS=Arabidopsis thaliana GN=PCO2 PE=1 SV=1
Gohir.D04G051000	-0.156447	-0.708215	-1.36798	-0.28789	0.0688858	-0.472467	Plant cysteine oxidase 2 OS=Arabidopsis thaliana GN=PCO2 PE=1 SV=1
Gohir.D13G210200	0.341467	1.38565	0.129331	-0.0964783	0.222816	0.0736686	Probable 2-oxoglutarate-dependent dioxygenase AOP1 OS=Arabidopsis thaliana GN=AOP1 PE=2 SV=1
Gohir.D13G210600	0.720402	1.13112	1.37522	0.0256165	0.375956	1.21134	Probable 2-oxoglutarate-dependent dioxygenase AOP1 OS=Arabidopsis thaliana GN=AOP1 PE=2 SV=1
							Probable 2-oxoglutarate-dependent dioxygenase AOP1 OS=Arabidopsis thaliana GN=AOP1 PE=2 SV=1
Gohir.A02G124000	-0.43	-0.55	-1.32	0.34	-0.06	-0.09	Probable 2-oxoglutarate-dependent dioxygenase AOP1.2 OS=Arabidopsis thaliana GN=AOP1.2 PE=2 SV=1
Gohir.A13G204500	0.326019	-1.28692	-1.18404	0.388749	0.162958	-0.426902	Probable 2-oxoglutarate-dependent dioxygenase AOP1.2 OS=Arabidopsis thaliana GN=AOP1.2 PE=2 SV=1
Gohir.D13G209900	0.337618	0.440255	-1.14592	0.175344	-0.0676368	-1.18769	Probable 2-oxoglutarate-dependent dioxygenase AOP1.2 OS=Arabidopsis thaliana GN=AOP1.2 PE=2 SV=1
Gohir.A05G129700	-0.103795	-0.0908058	-1.11505	-0.269144	0.0977633	-0.90411	Probable 2-oxoglutarate-dependent dioxygenase AOP1.2 OS=Arabidopsis thaliana GN=AOP1.2 PE=2 SV=1
Gohir.D05G361100	1.97856	0.657855	-0.368242	1.10171	-0.296922	-0.17564	Probable 2-oxoglutarate-dependent dioxygenase AOP1.2 OS=Arabidopsis thaliana GN=AOP1.2 PE=2 SV=1
Gohir.A05G184400	0.287912	0.1761	-1.31215	0.541969	-0.158565	-0.825473	Probable cinnamyl alcohol dehydrogenase 6 OS=Oryza sativa subsp. japonica GN=CAD6 PE=2 SV=2
Gohir.D13G160500	-0.412495	0.384799	1.33029	-0.169857	-0.0898181	0.258995	Probable linoleate 9S-lipoxygenase 5 OS=Solanum tuberosum GN=LOX1.5 PE=2 SV=1
Gohir.A08G210400	1.65242	1.24347	1.51632	1.11854	0.348764	-0.804973	Probable linoleate 9S-lipoxygenase 5 OS=Solanum tuberosum GN=LOX1.5 PE=2 SV=1
Gohir.A03G138800	1.15	0.93	0.26	0.96	0.17	-0.13	Probable nucleoredoxin 1 OS=Arabidopsis thaliana GN=At1g60420 PE=1 SV=1
Gohir.D02G161700	1.23672	1.12437	0.435159	0.885993	0.348278	0.25367	Probable nucleoredoxin 1 OS=Arabidopsis thaliana GN=At1g60420 PE=1 SV=1
Gohir.1Z057300	1.27	1.49	0.5	2.11	0.38	0.09	Protein DMR6-LIKE OXYGENASE 2 OS=Arabidopsis thaliana GN=DLO2 PE=2 SV=1
Gohir.A02G125500	1.66	1.24	0.98	1.29	0.55	-0.14	Protein DMR6-LIKE OXYGENASE 2 OS=Arabidopsis thaliana GN=DLO2 PE=2 SV=1
Gohir.D08G116600	1.03574	0.774835	0.276286	1.32349	-0.000771727	0.439725	Protein DOWNY MILDEW RESISTANCE 6 OS=Arabidopsis thaliana GN=DMR6 PE=1 SV=1
Gohir.A08G105000	1.35946	1.45371	0.614846	1.42902	0.136574	-0.086289	Protein DOWNY MILDEW RESISTANCE 6 OS=Arabidopsis thaliana GN=DMR6 PE=1 SV=1
Gohir.D05G271700	0.259228	-0.693655	-1.35615	-0.22678	0.240689	-0.436769	Putative UDP-glucuronate:xylan alpha-glucuronosyltransferase 3 OS=Arabidopsis thaliana GN=GUX3 PE=2 SV=1
Gohir.D03G079000	0.421026	0.273817	1.05484	0.138759	0.298009	0.748449	Respiratory burst oxidase homolog protein A OS=Solanum tuberosum GN=RBOHA PE=1 SV=1
Gohir.A03G098000	0.08	-0.49	-1.37	-0.27	-0.05	-0.37	Sphinganine C4-monooxygenase 1 OS=Arabidopsis thaliana GN=SBH1 PE=1 SV=1
Gohir.D02G125300	-0.228664	-0.224791	-1.24824	-0.19998	-0.0792822	-0.579979	Sphinganine C4-monooxygenase 1 OS=Arabidopsis thaliana GN=SBH1 PE=1 SV=1
Gohir.A05G269600	-0.0116114	-0.211467	-1.41123	-0.462496	0.314639	-0.0822011	Stearoyl-[acyl-carrier-protein] 9-desaturase 6, chloroplastic OS=Arabidopsis thaliana GN=S-ACP-DES6 PE=2 SV=2
Gohir.D02G175800	0.0346361	-0.156831	-1.18451	-0.265589	0.0646669	0.0669096	Sterol 14-demethylase OS=Arabidopsis thaliana GN=CYP51G1 PE=1 SV=1
Gohir.A03G153000	0.23	-0.13	-1.15	-0.35	0.12	-0.08	Sterol 14-demethylase OS=Arabidopsis thaliana GN=CYP51G1 PE=1 SV=1

## Sheet: Sheet3
					Gene	R-5dai	R-9dai	R-13dai	S-5dai	S-9dai	S-13dai	A. thaliana ortholog
					Gohir.A08G083500	-0.322349	-0.457215	-1.14995	-0.332036	0.0741454	-0.0392264	Peroxidase 16
					Gohir.D02G134600	-0.854873	-0.627882	-1.69622	-0.335706	0.301004	-0.245425	Peroxidase 27
					Gohir.A12G156000	-0.184746	-0.22593	-1.42427	0.18559	0.462352	0.0776082	Peroxidase 27
					Gohir.D02G134700	-0.562127	-0.463853	-1.22236	-0.114998	-0.203798	-0.919725	Peroxidase 3
					Gohir.A03G110100	-0.79	-0.34	-1.04	-0.17	-0.12	-0.66	Peroxidase 3
					Gohir.A12G008200	-0.330109	-0.70367	-1.39387	-0.336046	0.195751	-0.199338	Peroxidase 39
					Gohir.D12G062700	0.0395587	-1.274	-0.759009	-0.167558	0.0570958	0.345557	Peroxidase 39
					Gohir.D05G187000	-0.643895	-0.298333	-1.22273	-0.253776	0.170521	0.397176	Peroxidase 64
					Gohir.A05G280000	1.47668	1.44096	0.252566	1.87854	1.28903	0.648544	Peroxidase 4
					Gohir.D04G013800	0.380524	1.61766	0.529875	0.844517	0.849653	1.57305	Peroxidase 52
					Gohir.A05G401800	2.21354	2.4876	0.587735	1.66837	1.45347	2.05207	Peroxidase 52
					Gohir.D08G249300	-0.0574886	0.249405	1.01881	-0.736079	-0.366693	0.406727	Peroxidase 53
					Gohir.A08G229000	0.0629765	0.892857	1.57016	-0.866914	-0.288417	0.305973	Peroxidase 53
					Gohir.D04G154100	0.430256	1.04776	2.07593	0.0692187	0.330506	0.648824	Peroxidase N1
